# Supplementary material
Source: PubMed Central journal article supplement (PMC3314166)
Supplement: NIHMS362326-supplement-1_si_001.pdf [file NIHMS362326-supplement-1_si_001.pdf]

## **Catalytic Mechanism of Aromatic Prenylation by NphB**

Yue Yang, Yipu Miao, Bing Wang, Guanglei Cui and Kenneth M. Merz, Jr.

*Department of Chemistry and the Quantum Theory Project,  
2328 New Physics Building, P.O. Box 118435, University of Florida,  
Gainesville, Florida, 32611-8435; e-mail: [merz@qtp.ufl.edu](mailto:merz@qtp.ufl.edu)*

Corresponding author:

Kenneth M. Merz, Jr.

Phone: 352-392-6973

Fax: 352-392-8722

e-mail: [merz@qtp.ufl.edu](mailto:merz@qtp.ufl.edu)

Running Title: Simulation of NphB catalysis and product release

Funding acknowledgment:

This work was funded by NIH Grant No. GM044974

## Table of Content

S1. Abbreviations

S2. Additional Method and Computation Details

S3. Additional Figures

S4. Additional Tables

S5. Gaussian Input Structures

S6. References

## **S1. Abbreviations**

SCC-DFTB: self-consistent-charge density-functional tight-binding;

QM: quantum mechanics;

MD: molecular dynamics;

SMD: steered molecular dynamics;

US: umbrella sampling;

MM: molecular mechanics;

PMF: potential of mean force;

## S1. Additional Method and Computation Details

In recent years the SCC-DFTB/MM method has been extensively applied to enzymatic studies<sup>1,2</sup> with good success<sup>3-6</sup>. In a recent work focused on  $\beta$ -lactamase CphA<sup>6</sup>, the authors reported a 1 kcal/mol difference between SCC-DFTB/MM (SCC-DFTB/CHARMM) and BLYP/MM (BLYP/AMBERff99)<sup>7</sup> and good agreement between SCC-DFTB/MM (SCC-DFTB/CHARMM) and (B3LYP/6-31G\*)/CHARMM (at single point energies). Moreover, in our mechanistic study of protein farnesyltransferase, good agreement (less than 2kcal/mol) between the calculated free energy barrier (using SCC-DFTB/AMBERff99SB) and experimentally measure energy barrier has been achieved<sup>8</sup>. Therefore, in this study we continue to use SCC-DFTB/MM to study the mechanism of NphB catalysis.

In practice, we only included two reactants, GPP and 1,6-DHN in our QM region. This selection not only allows for fast computation and a large amount of simulation, but also avoids potential problem caused by the lack of an implicit dispersion term. Dispersion has been a well-known problem for SCC-DFTB and an explicit dispersion correction term has been developed to improve simulation with SCC-DFTB<sup>9,10</sup>. However, such a term may cause problem using AMBER during long MD simulations and in particular restraint MD simulations such as SMD or US\*. Hence, we decided to leave the sidechains from Lys119, Tyr121, Ser214, Tyr 216, Arg228, Lys284, Tyr288 in the MM region. Moreover, we left the Mg<sup>2+</sup> site in the MM region as well due to convergence issues. This resulted in a total of 56 atoms in the QM region and no link atoms were needed. In order to confirm that the AMBER force field ff99SB<sup>11</sup> models dispersion well, we made a comparison between 3 models in the US PMF study of 5-prenylation: in the

first model (MOD1), our normal QM-MM partition was applied, thus the interaction between geranyl moiety and Tyr121 would be handled exclusively by ff99SB; in the second model (MOD2), the sidechain of Tyr121 was included in the QM region (with the bond between  $C_\alpha$  and  $C_\beta$  being cut and a link atom introduced), in addition to GPP and 1,6-DHN while the explicit SCC-DFTB dispersion correction term was not applied; in the third model (MOD3), we applied the explicit dispersion correction to the same QM region selection as applied in MOD2. However, the third model failed to generate a complete free energy profile because the simulations failed to converge in the 1.5 to 2.2 Å windows\*. Therefore, only the 2.2 to 4.0 Å region was compared across three models (see Figure S1). Clearly, the dispersion correction term is essential for the success of SCC-DFTB/MM to describe the interaction between Tyr121 and the geranyl moiety, as MOD2 overestimated the free energy barrier by approximately 3 kcal/mol while MOD3 and MOD1 predicted almost identical barrier height despite a discrepancy of less than 0.1 Å in the location of transition state. These results suggested that the QM/MM Lennard-Jones term from AMBER ff99SB is capable of handling the dispersion effect between QM and MM residues.

The biggest concern associated with semi-empirical theories is always their transferability. To address this, we also validated SCC-DFTB's performance on truncated systems, although the set of parameters we used were actually parameterized against phosphate hydrolysis reactions. We have successfully validated and shown that SCC-DFTB could predict the free energy barrier of a prenylation reaction successfully<sup>8</sup>, therefore, the effort we report here will be focused on carbocation intermediate. We prepared a truncated system, including GPP, 1,6-DHN and two p-cresols, abstracted from

Tyr171 and Tyr216 by cleaving at C<sub>α</sub> and filling the free valence site on C<sub>β</sub>. Three states, the reactant state (RXT), the geranyl carbocation intermediate state (INT) and the prenylation product state (prenylated-1,6-DHN carbocation, PRO), were investigated. For each state, the truncated system was minimized (in the gas-phase) with SCC-DFTB using the SANDER module integrated in the AMBER11 package, followed by a HF/6-31G\* minimization using QUICK<sup>12</sup> module in the same program and a single point calculation at the M06-2X/6-31+G\*\* level using GAUSSIAN09. Then, three sets of results were collected and for each set, two values,  $\Delta E_1 = E_{\text{INT}} - E_{\text{RXT}}$  and  $\Delta E_2 = E_{\text{INT}} - E_{\text{PRO}}$ , were calculated and compared. For  $\Delta E_1$ , the SCC-DFTB result (88.2 kcal/mol) is 3.5 kcal/mol lower than the HF result (91.7 kcal/mol) and 1.4 kcal/mol higher than the M06-2X single point result (86.8 kcal/mol); while for  $\Delta E_2$ , the SCC-DFTB result (5.3 kcal/mol) is 2.0 and 0.9 kcal/mol higher than the HF (3.3 kcal/mol) and M06-2X result (4.4 kcal/mol), respectively. On the other hand, the geometries of the truncated system from the SCC-DFTB and HF minimization are nearly identical. Therefore, we drew the conclusion that SCC-DFTB is capable of capturing the carbocation intermediate and predicting the associated free energy barrier.

Additionally, we also tested for the possibility of including another dimension in the reaction coordinate (RC), specifically the C-O bond. However, similar to the situation we have encountered as well as Klein and coworkers, including the additional RC results in unphysical dissociative pathway. Hence, we only employed the 1D RC (C-C) for this catalytic reaction. This conclusion should not be generalized, in our opinion and should be tested in each individual case encountered.

In addition to the IEFPCM water model, the IEFPCM low dielectric ( $\epsilon=4$ ) model was applied to mimic the protein environment. The same trend as observed in the former case is reproduced, while the interaction energies are generally 1-3 kcal/mol more negative, meaning the interactions are more attractive. Although the interaction between GPP and DIN in P7 channel is attractive now, it is still much less attractive than in the other reaction channels (see Table S2).

\*See <http://structbio.vanderbilt.edu/archives/amber-archive/2009/2182.php>.

### S3. Additional Figures

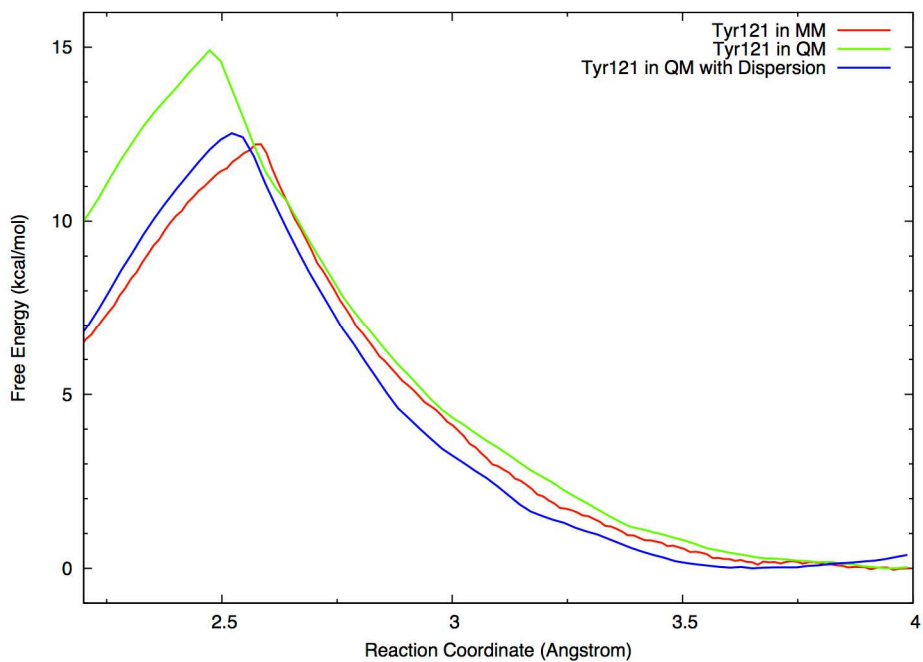

Figure S1. Method (QM selection) validation. (Red: MOD1. Green: MOD2. Blue: MOD3).



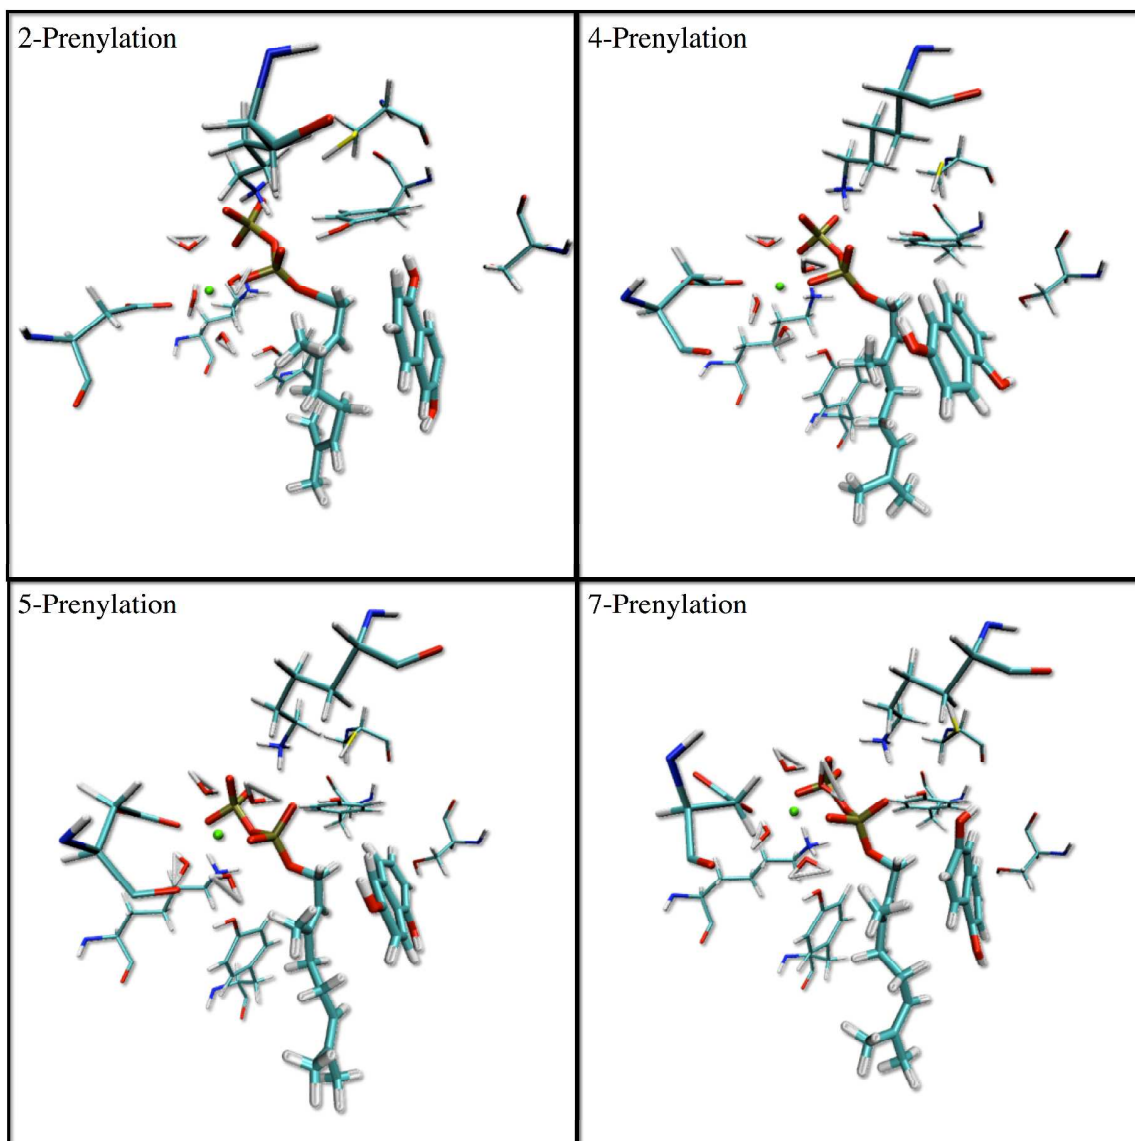

Figure S2. Snapshot of active site structures associated with rate-limiting transition state (TS1), corresponding to carbocation formation during prenylation step, for all 4 reaction channels.

#### S4. Additional Tables

|                     | P2-PCM  | P4-PCM  | P5-PCM  | P7-PCM  |
|---------------------|---------|---------|---------|---------|
| Y121 (hartree)      | -307.34 | -307.34 | -307.34 | -307.34 |
| Y216 (hartree)      | -307.34 | -307.35 | -307.34 | -307.34 |
| DHN (hartree)       | -536.12 | -536.13 | -536.12 | -536.12 |
| GPP (hartree)       | -390.85 | -390.85 | -390.85 | -390.86 |
| GPP+Y121 (hartree)  | -698.20 | -698.20 | -698.20 | -698.20 |
| GPP+Y216 (hartree)  | -698.19 | -698.20 | -698.19 | -698.20 |
| GPP+DHN (hartree)   | -927.00 | -926.99 | -926.99 | -926.97 |
| GPP-Y121 (kcal/mol) | -2.94   | -4.36   | -5.80   | -2.67   |
| GPP-Y216 (kcal/mol) | -0.70   | -1.34   | -0.67   | -0.53   |
| GPP-DHN (kcal/mol)  | -20.57  | -6.82   | -13.35  | 0.99    |

Table S1. Complete M06-2X/6-31G\*\* BSSE calculation results for the interaction energy of the “ $\pi$ -chamber” for the 4 possible prenylation products using IEFPCM water model. DHN = 1,6-DHN.

|                     | P2-PCM  | P4-PCM  | P5-PCM  | P7-PCM  |
|---------------------|---------|---------|---------|---------|
| Y121 (hartree)      | -307.34 | -307.34 | -307.34 | -307.34 |
| Y216 (hartree)      | -307.33 | -307.34 | -307.34 | -307.34 |
| DIN (hartree)       | -536.12 | -536.12 | -536.11 | -536.11 |
| GPP+Y121 (hartree)  | -698.18 | -698.18 | -698.18 | -698.18 |
| GPP+Y216 (hartree)  | -698.17 | -698.18 | -698.17 | -698.18 |
| GPP+DIN (hartree)   | -926.99 | -926.97 | -926.97 | -926.95 |
| GPP (hartree)       | -390.83 | -390.83 | -390.83 | -390.84 |
| GPP-Y121 (kcal/mol) | -4.48   | -6.18   | -7.35   | -4.20   |
| GPP-Y216 (kcal/mol) | -1.96   | -2.62   | -1.43   | -1.65   |
| GPP-DIN (kcal/mol)  | -23.85  | -9.65   | -16.50  | -2.45   |

Table S2. Complete M06-2X/6-31G\*\* BSSE calculation results for the interaction energy of the “ $\pi$ -chamber” for the 4 possible prenylation products using IEFPCM low dielectric water model ( $\epsilon=4$ ). DHN = 1,6-DHN.

## S5. Gaussian Input Structures

P2:

```
C 52.26100000 40.79300000 29.21000000
C 53.10300000 39.94800000 28.46200000
C 54.14000000 39.21100000 29.07400000
C 54.15000000 38.96200000 30.55700000
C 55.23600000 38.53400000 28.29200000
C 55.38200000 36.99200000 28.43100000
C 56.81400000 36.65000000 28.01700000
C 57.83500000 36.40900000 28.89500000
C 57.50900000 36.13500000 30.34200000
C 59.22000000 36.29200000 28.41500000
H 51.42800000 41.23900000 28.76400000
H 52.43900000 40.87800000 30.20900000
H 53.13200000 39.93000000 27.34600000
H 54.14000000 39.87700000 31.04900000
H 54.97700000 38.28400000 30.75200000
H 53.16300000 38.43100000 30.75700000
H 55.30900000 38.68700000 27.21100000
H 56.19100000 38.94700000 28.73900000
H 55.27900000 36.68500000 29.50500000
H 54.58800000 36.54700000 27.81900000
H 57.09200000 36.70200000 26.97900000
H 57.17200000 37.08900000 30.86600000
H 58.36300000 35.69300000 30.89500000
H 56.66200000 35.37100000 30.34300000
H 59.84800000 37.09100000 28.74700000
H 59.26000000 36.42700000 27.30300000
H 59.60000000 35.31100000 28.76700000
C 55.42300000 41.85600000 27.63300000
C 56.42300000 41.27700000 26.84200000
C 56.18400000 41.11600000 25.42200000
C 55.05800000 41.69200000 24.83300000
C 54.06600000 42.23000000 25.63800000
C 53.25500000 42.97500000 27.88600000
C 54.50200000 42.31900000 29.88600000
C 55.57100000 41.83700000 29.05600000
O 52.30600000 43.71000000 27.34700000
O 57.09600000 40.50800000 24.64600000
C 53.30300000 42.81800000 29.29300000
C 54.20300000 42.31800000 27.04100000
H 57.43800000 41.05800000 27.20600000
H 54.89200000 41.53800000 23.77400000
H 53.14700000 42.60100000 25.14600000
H 54.59300000 42.27300000 30.99600000
H 56.54300000 41.50600000 29.44700000
H 51.81500000 44.20100000 28.04300000
H 57.90400000 40.12900000 25.09000000
H 52.61400000 43.36500000 29.92700000
C 53.02700000 33.86400000 27.18400000
C 53.36700000 33.63600000 28.56400000
H 54.03900000 32.84500000 28.86200000
C 52.81800000 34.49700000 29.54500000
H 53.02400000 34.34900000 30.59500000
C 52.03400000 35.53000000 29.19600000
O 51.38400000 36.26800000 30.15700000
H 51.57800000 35.94700000 31.04100000
C 51.71100000 35.81200000 27.88400000
H 50.96600000 36.57400000 27.70700000
C 52.27500000 35.00800000 26.88800000
H 52.11300000 35.33100000 25.87000000
C 47.97500000 41.44000000 23.99600000
C 47.13300000 40.96000000 25.00800000
H 46.33300000 40.26300000 24.80700000
C 47.28400000 41.38500000 26.39100000
H 46.71400000 41.03200000 27.23700000
C 48.43600000 42.17600000 26.65300000
O 48.76100000 42.45600000 27.94800000
H 48.43900000 41.86600000 28.63400000
C 49.33000000 42.64400000 25.55900000
H 50.05500000 43.36600000 25.90400000
C 49.07300000 42.26400000 24.29200000
H 49.75000000 42.61000000 23.52500000
H 53.33624115 33.18690606 26.41535593
H 47.77766555 41.17371399 22.97862550
```

P4:

|   |             |             |             |
|---|-------------|-------------|-------------|
| C | 49.97400000 | 38.66400000 | 29.85700000 |
| C | 50.90700000 | 37.67800000 | 29.77000000 |
| C | 51.56000000 | 37.04300000 | 30.89200000 |
| C | 51.14000000 | 37.31600000 | 32.26400000 |
| C | 52.67400000 | 36.14600000 | 30.65000000 |
| C | 53.96200000 | 36.95300000 | 30.27500000 |
| C | 55.08200000 | 35.96500000 | 29.82900000 |
| C | 55.59100000 | 35.02300000 | 30.62900000 |
| C | 55.13300000 | 34.89600000 | 32.00800000 |
| C | 56.60700000 | 34.08000000 | 30.11400000 |
| H | 49.48200000 | 39.12200000 | 28.98600000 |
| H | 49.55600000 | 39.04400000 | 30.81600000 |
| H | 51.27700000 | 37.47500000 | 28.75600000 |
| H | 51.91400000 | 36.87500000 | 32.92100000 |
| H | 50.13100000 | 36.91700000 | 32.55500000 |
| H | 51.16400000 | 38.41500000 | 32.38300000 |
| H | 52.77800000 | 35.50400000 | 31.46100000 |
| H | 52.44600000 | 35.48800000 | 29.74400000 |
| H | 53.74900000 | 37.67200000 | 29.49900000 |
| H | 54.37400000 | 37.55700000 | 31.09000000 |
| H | 55.30600000 | 35.95100000 | 28.73500000 |
| H | 54.73700000 | 35.95400000 | 32.28700000 |
| H | 55.93000000 | 34.50100000 | 32.72300000 |
| H | 54.31700000 | 34.15800000 | 32.06200000 |
| H | 57.62000000 | 34.21300000 | 30.50800000 |
| H | 56.70600000 | 34.34000000 | 28.99900000 |
| H | 56.32700000 | 33.04900000 | 30.32000000 |
| C | 52.09280619 | 40.48648115 | 30.36931700 |
| C | 52.04380619 | 40.64848115 | 31.79631700 |
| C | 53.14680619 | 40.38648115 | 32.58031700 |
| C | 54.38680619 | 40.13048115 | 31.89831700 |
| C | 54.42880619 | 39.97248115 | 30.55331700 |
| C | 53.25580619 | 39.65148115 | 28.37831700 |
| C | 50.90280619 | 40.38148115 | 28.22531700 |
| C | 50.90480619 | 40.69148115 | 29.57731700 |
| O | 54.32280619 | 38.90848115 | 27.94731700 |
| O | 53.17980619 | 40.57348115 | 33.94331700 |
| C | 52.08280619 | 39.85448115 | 27.63231700 |
| C | 53.27180619 | 40.02948115 | 29.74031700 |
| H | 51.14980619 | 41.05748115 | 32.25831700 |
| H | 55.51700000 | 40.19900000 | 32.40000000 |
| H | 55.42080619 | 39.74148115 | 30.11731700 |
| H | 50.09980619 | 40.53148115 | 27.54131700 |
| H | 50.13900000 | 41.44000000 | 30.08900000 |
| H | 54.29180619 | 38.90548115 | 26.94831700 |
| H | 52.22980619 | 40.47948115 | 34.20831700 |
| H | 52.00980619 | 39.47748115 | 26.58231700 |
| C | 50.49100000 | 32.32800000 | 30.00400000 |
| C | 50.68300000 | 31.94000000 | 31.30700000 |
| H | 51.18700000 | 31.00000000 | 31.47600000 |
| C | 50.08700000 | 32.71000000 | 32.38100000 |
| H | 50.31200000 | 32.27200000 | 33.34300000 |
| C | 49.48000000 | 34.00500000 | 32.04600000 |
| O | 48.96200000 | 34.80400000 | 33.01100000 |
| H | 49.05800000 | 34.43100000 | 33.89000000 |
| C | 49.33400000 | 34.29800000 | 30.71600000 |
| H | 48.85400000 | 35.21800000 | 30.41900000 |
| C | 49.78600000 | 33.48000000 | 29.66500000 |
| H | 49.54200000 | 33.88000000 | 28.69200000 |
| C | 46.28900000 | 40.06400000 | 26.24300000 |
| C | 45.42800000 | 39.62500000 | 27.26700000 |
| H | 44.56000000 | 39.01000000 | 27.08400000 |
| C | 45.64900000 | 39.90600000 | 28.59900000 |
| H | 45.04900000 | 39.51900000 | 29.40900000 |
| C | 46.69000000 | 40.80000000 | 28.93300000 |
| O | 47.08300000 | 41.12200000 | 30.21000000 |
| H | 46.52300000 | 40.72100000 | 30.87900000 |
| C | 47.53800000 | 41.25200000 | 27.89700000 |
| H | 48.36800000 | 41.90800000 | 28.11200000 |
| C | 47.32400000 | 40.92400000 | 26.59000000 |
| H | 47.92000000 | 41.34500000 | 25.79400000 |
| H | 50.89785425 | 31.72323425 | 29.22065588 |
| H | 46.15089639 | 39.74584296 | 25.23077300 |

P5:

C 51.89200000 39.92500000 29.29900000  
C 52.51200000 39.06800000 28.38300000  
C 53.69500000 38.33100000 28.81100000  
C 54.15800000 38.19800000 30.20100000  
C 54.49000000 37.66500000 27.75500000  
C 55.96900000 37.53600000 27.84600000  
C 56.51000000 36.51400000 28.80300000  
C 57.78700000 36.16400000 28.85600000  
C 58.78500000 36.66400000 27.87700000  
C 58.33000000 35.38700000 29.96900000  
H 51.17100000 40.57900000 28.86900000  
H 52.01000000 39.85700000 30.33900000  
H 52.24500000 39.12800000 27.37100000  
H 55.20200000 38.39600000 30.29000000  
H 54.02400000 37.17500000 30.33400000  
H 53.55600000 38.81600000 30.92600000  
H 53.85100000 36.66200000 27.73500000  
H 54.22100000 38.06800000 26.75600000  
H 56.38700000 37.45800000 26.83600000  
H 56.35200000 38.52900000 28.18600000  
H 55.71100000 36.01800000 29.42900000  
H 59.58300000 35.93400000 27.91700000  
H 59.20200000 37.61400000 28.24000000  
H 58.22700000 36.83400000 26.91400000  
H 57.52700000 34.76500000 30.36400000  
H 58.50100000 36.02800000 30.88300000  
H 59.24900000 34.80900000 29.76200000  
C 53.51729337 41.68700423 27.78569555  
C 53.18229337 41.71600423 29.16969555  
C 54.30429337 41.52000423 30.02569555  
C 55.62129337 41.17500423 29.59669555  
C 55.75229337 40.97700423 28.24069555  
C 54.96329337 41.18000423 25.89769555  
C 52.86129337 42.20800423 25.48669555  
C 52.54329337 42.14100423 26.83169555  
O 56.13329337 40.52200423 25.48869555  
O 54.17729337 41.48200423 31.34569555  
C 54.08629337 41.69200423 25.00669555  
C 54.77329337 41.27400423 27.29669555  
H 52.29929337 42.30800423 29.46069555  
H 56.66000000 41.19500000 30.23700000  
H 56.69829337 40.60200423 27.85769555  
H 52.10529337 42.47200423 24.78169555  
H 51.59229337 42.46900423 27.23069555  
H 56.07129337 40.40400423 24.49969555  
H 53.26529337 41.73700423 31.65369555  
H 54.28329337 41.65900423 23.94869555  
C 52.96300000 33.73300000 27.25300000  
C 53.24900000 33.60900000 28.62300000  
H 53.86500000 32.78700000 28.95700000  
C 52.69900000 34.44600000 29.56800000  
H 52.94300000 34.35700000 30.61600000  
C 51.84300000 35.50400000 29.22700000  
O 51.25000000 36.27300000 30.16500000  
H 51.42200000 35.80900000 30.98700000  
C 51.58600000 35.66400000 27.86500000  
H 50.89200000 36.44100000 27.58100000  
C 52.15400000 34.87000000 26.86500000  
H 51.91600000 35.09500000 25.83600000  
C 47.95000000 41.30900000 23.75400000  
C 47.35000000 40.62300000 24.83900000  
H 46.73600000 39.77600000 24.57000000  
C 47.70000000 40.92400000 26.21100000  
H 47.40500000 40.41400000 27.11600000  
C 48.51200000 42.03500000 26.49800000  
O 49.01800000 42.21900000 27.72600000  
H 48.77800000 41.45900000 28.26100000  
C 49.04000000 42.75900000 25.41800000  
H 49.68600000 43.60200000 25.61200000  
C 48.76300000 42.42700000 24.06800000  
H 49.25600000 42.99700000 23.29400000  
H 53.32327481 33.02588567 26.53530132  
H 47.79617647 40.99686047 22.74216640

P7:

|   |             |             |             |
|---|-------------|-------------|-------------|
| C | 51.97800000 | 40.73500000 | 28.98200000 |
| C | 52.83500000 | 39.61900000 | 28.97600000 |
| C | 53.32000000 | 39.09200000 | 30.15200000 |
| C | 52.94300000 | 39.42300000 | 31.55800000 |
| C | 54.38600000 | 38.05800000 | 30.04000000 |
| C | 55.67800000 | 38.74900000 | 30.52300000 |
| C | 56.83300000 | 38.01100000 | 29.85600000 |
| C | 57.67100000 | 37.15300000 | 30.43100000 |
| C | 57.68000000 | 36.78800000 | 31.88600000 |
| C | 58.69000000 | 36.45300000 | 29.59900000 |
| H | 51.67300000 | 41.27700000 | 28.13900000 |
| H | 51.52500000 | 41.03400000 | 29.92700000 |
| H | 53.26800000 | 39.40100000 | 28.03100000 |
| H | 52.95900000 | 38.56000000 | 32.24600000 |
| H | 51.92800000 | 39.91100000 | 31.67800000 |
| H | 53.67900000 | 40.25100000 | 31.87500000 |
| H | 54.23400000 | 37.12500000 | 30.63600000 |
| H | 54.52300000 | 37.77300000 | 28.98100000 |
| H | 55.60000000 | 39.80400000 | 30.16500000 |
| H | 55.71300000 | 38.78200000 | 31.65100000 |
| H | 57.15800000 | 38.20300000 | 28.80000000 |
| H | 58.68600000 | 36.96600000 | 32.30300000 |
| H | 57.47800000 | 35.76000000 | 32.10300000 |
| H | 56.96000000 | 37.47400000 | 32.42400000 |
| H | 58.59900000 | 36.80300000 | 28.61700000 |
| H | 58.49000000 | 35.37200000 | 29.59400000 |
| H | 59.72300000 | 36.60000000 | 29.94500000 |
| C | 53.35012996 | 42.62501132 | 26.41658253 |
| C | 52.38512996 | 43.28401132 | 27.14758253 |
| C | 52.25912996 | 43.26501132 | 28.51858253 |
| C | 53.22712996 | 42.50101132 | 29.34858253 |
| C | 54.11412996 | 41.76101132 | 28.55358253 |
| C | 55.24412996 | 41.11101132 | 26.43958253 |
| C | 54.20212996 | 41.86601132 | 24.32858253 |
| C | 53.27812996 | 42.58801132 | 25.00458253 |
| O | 56.18912996 | 40.50301132 | 27.14758253 |
| O | 51.23712996 | 43.90301132 | 29.17458253 |
| C | 55.19112996 | 41.09201132 | 25.04658253 |
| C | 54.24612996 | 41.85801132 | 27.12758253 |
| H | 51.57412996 | 43.78501132 | 26.54058253 |
| H | 53.19412996 | 42.61101132 | 30.45958253 |
| H | 54.97212996 | 41.29301132 | 29.06458253 |
| H | 54.04612996 | 41.76801132 | 23.26058253 |
| H | 52.53712996 | 43.11801132 | 24.52258253 |
| H | 56.84412996 | 40.01901132 | 26.60858253 |
| H | 50.76612996 | 44.53201132 | 28.55258253 |
| H | 55.83712996 | 40.46801132 | 24.43858253 |
| C | 52.76600000 | 33.51000000 | 27.86400000 |
| C | 52.67200000 | 33.26100000 | 29.27700000 |
| H | 53.10800000 | 32.34600000 | 29.65200000 |
| C | 52.22800000 | 34.19500000 | 30.18500000 |
| H | 52.24900000 | 34.07300000 | 31.25800000 |
| C | 51.76500000 | 35.45900000 | 29.71000000 |
| O | 51.20300000 | 36.34800000 | 30.65000000 |
| H | 51.19900000 | 36.01500000 | 31.55100000 |
| C | 51.81300000 | 35.74700000 | 28.35000000 |
| H | 51.42900000 | 36.65200000 | 27.90300000 |
| C | 52.38800000 | 34.83100000 | 27.46400000 |
| H | 52.60300000 | 35.02900000 | 26.42400000 |
| C | 47.55600000 | 41.59500000 | 24.31000000 |
| C | 46.82800000 | 41.06100000 | 25.40500000 |
| H | 46.05900000 | 40.33200000 | 25.19500000 |
| C | 47.14200000 | 41.40400000 | 26.76300000 |
| H | 46.63800000 | 40.87700000 | 27.56000000 |
| C | 48.13800000 | 42.37500000 | 26.99400000 |
| O | 48.50700000 | 42.58800000 | 28.25800000 |
| H | 48.21000000 | 41.91800000 | 28.87800000 |
| C | 48.85100000 | 43.00400000 | 25.90000000 |
| H | 49.56900000 | 43.79200000 | 26.07300000 |
| C | 48.52100000 | 42.57400000 | 24.58500000 |
| H | 49.14100000 | 42.98300000 | 23.80100000 |
| H | 53.09259703 | 32.76672451 | 27.16702373 |
| H | 47.37465097 | 41.26199119 | 23.30944133 |

## S6. References

- (1) Cui, Q.; Riccardi, D.; Schaefer, P.; Yang, Y.; Yu, H. B.; Ghosh, N.; Prat-Resina, X.; Konig, P.; Li, G. H.; Xu, D. G.; Guo, H.; Elstner, M. *J. Phys. Chem. B* **2006**, *110*, 6458-6469.
- (2) Elstner, M. *Theor. Chem. Acc.* **2006**, *116*, 316-325.
- (3) Guo, H.; Xu, D.; Cui, G. *J. Am. Chem. Soc.* **2007**, *129*, 10814-10822.
- (4) Xu, D. G.; Guo, H. *J. Am. Chem. Soc.* **2009**, *131*, 9780-9788.
- (5) Zhang, Y.; Cao, R.; Yin, F.; Hudock, M. P.; Guo, R.-T.; Krysiak, K.; Mukherjee, S.; Gao, Y.-G.; Robinson, H.; Song, Y.; No, J. H.; Bergan, K.; Leon, A.; Cass, L.; Goddard, A.; Chang, T.-K.; Lin, F.-Y.; Beek, E. V.; Papapoulos, S.; Wang, A. H.-J.; Kubo, T.; Ochi, M.; Mukkamala, D.; Oldfield, E. *J. Am. Chem. Soc.* **2009**, *0*.
- (6) Xu, D. G.; Wu, S. S.; Guo, H. *J. Am. Chem. Soc.* **2010**, *132*, 17986-17988.
- (7) Simona, F.; Magistrato, A.; Dal Peraro, M.; Cavalli, A.; Vila, A. J.; Carloni, P. *J. Biol. Chem.* **2009**, *284*, 28164-28171.
- (8) Yang, Y.; Wang, B.; Ucisik, M. N.; Cui, G.; Fierke, C. A.; Merz Jr, K. M. *J. Am. Chem. Soc.* **2012**, *134*, 820-823.
- (9) Elstner, M.; Frauenheim, T.; Kaxiras, E.; Seifert, G.; Suhai, S. *Physica Status Solidi B-Basic Research* **2000**, *217*, 357-376.
- (10) Elstner, M.; Hobza, P.; Frauenheim, T.; Suhai, S.; Kaxiras, E. *J. Chem. Phys.* **2001**, *114*, 5149-5155.
- (11) Hornak, V.; Abel, R.; Okur, A.; Strockbine, B.; Roitberg, A.; Simmerling, C. *Proteins-Structure Function and Bioinformatics* **2006**, *65*, 712-725.
- (12) Yipu Miao; Xiao He; Kenneth B. Ayers; Edward N. Brothers; Kenneth M. Merz, J.; University of Florida: Gainesville, FL, 2010.
